# Supplementary material for: Measurement-device-independent quantum key distribution for Scarani-Acin-Ribordy-Gisin 04 protocol
Source: Springer Nature journal article supplement (doi:10.1038/srep05236), 2014-06-10
Supplement: 41598_2014_BFsrep05236_MOESM1_ESM.pdf [file 41598_2014_BFsrep05236_MOESM1_ESM.pdf]

# Supplementary material: Measurement-device-independent quantum key distribution for Scarani-Acin-Ribordy-Gisin 04 protocol

Akihiro Mizutani,<sup>1</sup> Kiyoshi Tamaki,<sup>2</sup> Rikizo Ikuta,<sup>1</sup> Takashi Yamamoto,<sup>1</sup> and Nobuyuki Imoto<sup>1</sup>

<sup>1</sup>*Graduate School of Engineering Science, Osaka University, Toyonaka, Osaka 560-8531, Japan*

<sup>2</sup>*NTT Basic Research Laboratories, NTT Corporation, 3-1, Morinosato-Wakamiya Atsugi-Shi, 243-0198, Japan*

## I. DETAILS OF THE SIMULATION

Here we describe the details of our simulation. The quantum efficiency and the dark counting of the detectors are  $\eta = 0.045$  and  $d = 8.5 \times 10^{-7}$ , respectively. The loss coefficient of the quantum channel is  $\xi = 0.21\text{dB/km}$ . We denote  $a = \cos(\pi/8)$  and  $b = \sin(\pi/8)$ . We define that  $p_{i,ab}^{(n,m)}$  is a probability that the photons are detected as the successful event of Type  $i$  conditioned that Alice and Bob emit  $n$  and  $m$  photons in the states  $|\varphi_a\rangle$  and  $|\varphi_b\rangle$  for  $a, b = 0, \dots, 3$ , respectively.  $q_{i,ab}$  is the probability of the successful detection of Type  $i$  conditioned that Alice and Bob emit photons in  $|\varphi_a\rangle$  and  $|\varphi_b\rangle$ , respectively. Assuming that Eve is in the middle of Alice and Bob, the channel transmittance to Eve from Alice is the same as that from Bob. Denoting that  $l$  is the distance between Alice and Bob, the channel transmittance for Alice and Bob is

$$T = 10^{-\xi 0.5l/10}. \quad (1)$$

In the following, we give the experimental data for the simulation (i) when Eve postselects the events with  $n \leq 1$  and  $m \leq 1$  by the QND measurement before mixing the pulses from Alice and Bob (see Fig. 2(a)), and (ii) when Alice and Bob use quasi single photon sources by the SPDC (see Fig. 2(b)).

### A. Case (i) Eve performs the QND measurement.

Each of Alice and Bob uses a phase randomized weak coherent pulse with the mean photon number of  $\mu$ . The probability  $p_n$  for  $n$ -photon emission is

$$p_n(\mu) = e^{-\mu} \frac{\mu^n}{n!}. \quad (2)$$

For later use, we define the equations

$$f_1 = (1-d)^2(2\eta^2 a^2 b^2(1+3d) + 2\eta(1-\eta)d + 2(1-\eta)^2 d^2), \quad (3)$$

$$f_2 = f_1 - (1-d)^2 2a^2 b^2 \eta^2, \quad (4)$$

$$f_3 = (1-d)^2(\eta d + 2(1-\eta)d^2), \quad (5)$$

$$f_4 = (1-d)^2 2d^2, \quad (6)$$

$$f_5 = (1-d)^2(2\eta^2 a^2 b^2(1+d) + 2\eta(1-\eta)d + 2(1-\eta)^2 d^2). \quad (7)$$

In the following, we give  $Q_i^{(n,m)}$  and  $e_{i,\text{bit}}^{(n,m)}$ .

For Type1, we have

$$Q_1^{(1,1)} = p_1^2(\mu)(2p_{1,00}^{(1,1)} + p_{1,01}^{(1,1)} + p_{1,12}^{(1,1)})/4, \quad (8)$$

$$e_{1,\text{bit}}^{(1,1)} = p_1^2(\mu)p_{1,00}^{(1,1)}/(2Q_1^{(1,1)}), \quad (9)$$

$$Q_1^{(1,2)} = p_1(\mu)p_2(\mu)(2p_{1,00}^{(1,2)} + p_{1,01}^{(1,2)} + p_{1,12}^{(1,2)})/4, \quad (10)$$

$$e_{1,\text{bit}}^{(1,2)} = p_1(\mu)p_2(\mu)p_{1,00}^{(1,2)}/(2Q_1^{(1,2)}), \quad (11)$$

$$Q_1^{\text{tot}} = (2q_{1,00} + q_{1,01} + q_{1,12})/4, \quad (12)$$

$$e_1^{\text{tot}} = q_{1,00}/(2Q_1^{\text{tot}}). \quad (13)$$

Here the probabilities are expressed as

$$p_{1,00}^{(1,1)} = T^2 f_2 + 2T(1-T)f_3 + (1-T)^2 f_4, \quad (14)$$

$$p_{1,01}^{(1,1)} = T^2 f_1 + 2T(1-T)f_3 + (1-T)^2 f_4, \quad (15)$$

$$p_{1,12}^{(1,1)} = T^2 f_5 + 2T(1-T)f_3 + (1-T)^2 f_4, \quad (16)$$

$$p_{1,00}^{(1,2)} = (1-T)(T^2 f_2 + T(1-T)f_3 + p_{1,00}^{(1,1)}), \quad (17)$$

$$p_{1,01}^{(1,2)} = (1-T)(T^2 f_1 + T(1-T)f_3 + p_{1,01}^{(1,1)}), \quad (18)$$

$$p_{1,12}^{(1,2)} = (1-T)(T^2 f_5 + T(1-T)f_3 + p_{1,12}^{(1,1)}), \quad (19)$$

$$q_{1,00} = p_0^2(T\mu)f_4 + 2p_0(T\mu)p_1(T\mu)f_3 + p_1^2(T\mu)f_2, \quad (20)$$

$$q_{1,01} = p_0^2(T\mu)f_4 + 2p_0(T\mu)p_1(T\mu)f_3 + p_1^2(T\mu)f_1, \quad (21)$$

$$q_{1,12} = p_0^2(T\mu)f_4 + 2p_0(T\mu)p_1(T\mu)f_3 + p_1^2(T\mu)f_5. \quad (22)$$

For Type2, we have

$$Q_2^{(1,1)} = p_1^2(\mu)(p_{2,00}^{(1,1)} + p_{2,01}^{(1,1)})/4, \quad (23)$$

$$e_{2,\text{bit}}^{(1,1)} = p_1^2(\mu)p_{2,01}^{(1,1)}/(4Q_2^{(1,1)}), \quad (24)$$

$$Q_2^{(1,2)} = p_1(\mu)p_2(\mu)(p_{2,00}^{(1,2)} + p_{2,01}^{(1,2)})/4, \quad (25)$$

$$e_{2,\text{bit}}^{(1,2)} = p_1(\mu)p_2(\mu)p_{2,01}^{(1,2)}/(4Q_2^{(1,2)}), \quad (26)$$

$$Q_2^{\text{tot}} = (q_{2,00} + q_{2,01})/4, \quad (27)$$

$$e_2^{\text{tot}} = q_{2,01}/(4Q_2^{\text{tot}}), \quad (28)$$

where

$$p_{2,00}^{(1,1)} = p_{1,01}^{(1,1)}, \quad (29)$$

$$p_{2,01}^{(1,1)} = p_{1,00}^{(1,1)}, \quad (30)$$

$$p_{2,00}^{(1,2)} = p_{1,01}^{(1,2)}, \quad (31)$$

$$p_{2,01}^{(1,2)} = p_{1,00}^{(1,2)}, \quad (32)$$

$$q_{2,00} = q_{1,01}, \quad (33)$$

$$q_{2,01} = q_{1,00}. \quad (34)$$

### B. Case (ii) Alice and Bob use the heralded single photon sources.

From Ref. [1], the probability distribution function of the thermal state conditioned that the detector  $D_0$  clicked in Fig. 2(b) is

$$P_n = \frac{1}{P_{\text{click}}} \frac{\mu^n (1 - (1 - \eta)^n + d)}{(1 + \mu)^{n+1}}, \quad (35)$$

where  $P_{\text{click}}$  is the probability that the detector  $D_0$  clicks, which is described by

$$P_{\text{click}} = \frac{(1 + d)(1 + \mu\eta) - 1}{1 + \mu\eta}. \quad (36)$$

By defining  $\eta_{\text{in}} = \eta T$ , the probability that  $n$  photons exist before the BS conditioned on the click of  $D_0$  is

$$Q_n = \frac{1}{P_{\text{click}}} \left( \frac{(1 + d)(\mu\eta_{\text{in}})^n}{(1 + \mu\eta_{\text{in}})^{n+1}} - \frac{(\mu\eta_{\text{in}}(1 - \eta))^n}{(1 + \mu(\eta_{\text{in}} + \eta - \eta_{\text{in}}\eta))^{n+1}} \right). \quad (37)$$

For Type1, the relevant equations for  $Q_1^{(n,m)}$  and  $e_{1,\text{bit}}^{(n,m)}$  are expressed by

$$Q_1^{(1,1)} = P_1^2(2p_{1,00}^{(1,1)} + p_{1,01}^{(1,1)} + p_{1,12}^{(1,1)})/4, \quad (38)$$

$$e_1^{(1,1)} = P_1^2 p_{1,00}^{(1,1)} / (2Q_1^{(1,1)}), \quad (39)$$

$$Q_1^{(1,2)} = P_1 P_2 (2p_{1,00}^{(1,2)} + p_{1,01}^{(1,2)} + p_{1,12}^{(1,2)})/4, \quad (40)$$

$$e_1^{(1,2)} = P_1 P_2 p_{1,00}^{(1,2)} / (2Q_1^{(1,2)}), \quad (41)$$

$$Q_1^{\text{tot}} = (2q_{1,00} + q_{1,01} + q_{1,12})/4, \quad (42)$$

$$e_1^{\text{tot}} = q_{1,00} / (2Q_1^{\text{tot}}), \quad (43)$$

where

$$p_{1,00}^{(1,1)} = \eta_{\text{in}}^2 g_4 + 2\eta_{\text{in}}(1 - \eta_{\text{in}})g_2 + (1 - \eta_{\text{in}})^2 g_1, \quad (44)$$

$$p_{1,01}^{(1,1)} = \eta_{\text{in}}^2 g_3 + 2\eta_{\text{in}}(1 - \eta_{\text{in}})g_2 + (1 - \eta_{\text{in}})^2 g_1, \quad (45)$$

$$p_{1,12}^{(1,1)} = \eta_{\text{in}}^2 g_8 + 2\eta_{\text{in}}(1 - \eta_{\text{in}})g_2 + (1 - \eta_{\text{in}})^2 g_1, \quad (46)$$

$$p_{1,00}^{(1,2)} = \eta_{\text{in}}^3 g_6 + 2\eta_{\text{in}}^2(1 - \eta_{\text{in}})g_4 + \eta_{\text{in}}^2(1 - \eta_{\text{in}})g_7 + 3\eta_{\text{in}}(1 - \eta_{\text{in}})^2 g_2 + (1 - \eta_{\text{in}})^3 g_1, \quad (47)$$

$$p_{1,01}^{(1,2)} = \eta_{\text{in}}^3 g_5 + 2\eta_{\text{in}}^2(1 - \eta_{\text{in}})g_3 + \eta_{\text{in}}^2(1 - \eta_{\text{in}})g_7 + 3\eta_{\text{in}}(1 - \eta_{\text{in}})^2 g_2 + (1 - \eta_{\text{in}})^3 g_1, \quad (48)$$

$$p_{1,12}^{(1,2)} = \eta_{\text{in}}^3 g_9 + 2\eta_{\text{in}}^2(1 - \eta_{\text{in}})g_8 + \eta_{\text{in}}^2(1 - \eta_{\text{in}})g_7 + 3\eta_{\text{in}}(1 - \eta_{\text{in}})^2 g_2 + (1 - \eta_{\text{in}})^3 g_1, \quad (49)$$

$$q_{1,00} = Q_0^2 g_1 + 2Q_0 Q_1 g_2 + Q_1^2 g_4 + 2Q_0 Q_2 g_7 + 2Q_1 Q_2 g_6 + \sum_{n,m=2}^{\infty} Q_n Q_m \quad (50)$$

$$q_{1,01} = Q_0^2 g_1 + 2Q_0 Q_1 g_2 + Q_1^2 g_3 + 2Q_0 Q_2 g_7 + 2Q_1 Q_2 g_5 \quad (51)$$

$$q_{1,12} = Q_0^2 g_1 + 2Q_0 Q_1 g_2 + Q_1^2 g_8 + 2Q_0 Q_2 g_7 + 2Q_1 Q_2 g_9. \quad (52)$$

We note that in equation (50), we took the pessimistic scenario that all of the events for  $n \geq 2$  and  $m \geq 2$  are detected as the bit error. Here  $g_1, \dots, g_9$  are given by

$$g_1 = (1 - d)^2 2d^2, \quad (53)$$

$$g_2 = (1 - d)^2 d, \quad (54)$$

$$g_3 = (1 - d)^2 (2a^2 b^2 + (a^4 + b^4)d), \quad (55)$$

$$g_4 = g_3 - (1 - d)^2 2a^2 b^2, \quad (56)$$

$$g_5 = (1 - d)^2 (9(a^4 b^2 + a^2 b^4) + 3(a^6 + b^6)d)/4, \quad (57)$$

$$g_6 = (1 - d)^2 ((a^4 b^2 + a^2 b^4) + 3(a^6 + b^6)d)/4, \quad (58)$$

$$g_7 = g_3/2, \quad (59)$$

$$g_8 = (1 - d)^2 2a^2 b^2 (1 + d), \quad (60)$$

$$g_9 = (1 - d)^2 (a^6 + b^6 + 3(a^4 b^2 + a^2 b^4)d)/4. \quad (61)$$

For Type2, we have

$$Q_2^{(1,1)} = P_1^2 (p_{2,00}^{(1,1)} + p_{2,01}^{(1,1)})/4, \quad (62)$$

$$e_2^{(1,1)} = P_1^2 p_{2,01}^{(1,1)} / (4Q_2^{(1,1)}), \quad (63)$$

$$Q_2^{(1,2)} = P_1 P_2 (p_{2,00}^{(1,2)} + p_{2,01}^{(1,2)})/4, \quad (64)$$

$$e_2^{(1,2)} = P_1 P_2 p_{2,01}^{(1,2)} / (4Q_2^{(1,2)}), \quad (65)$$

$$Q_2^{\text{tot}} = (q_{2,00} + q_{2,01})/4, \quad (66)$$

$$e_2^{\text{tot}} = q_{2,01} / (4Q_2^{\text{tot}}), \quad (67)$$

where

$$p_{2,00}^{(1,1)} = p_{1,01}^{(1,1)}, \quad (68)$$

$$p_{2,01}^{(1,1)} = p_{1,00}^{(1,1)}, \quad (69)$$

$$p_{2,00}^{(1,2)} = p_{1,01}^{(1,2)}, \quad (70)$$

$$p_{2,01}^{(1,2)} = p_{1,00}^{(1,2)}, \quad (71)$$

$$q_{2,00} = q_{1,01}, \quad (72)$$

$$q_{2,01} = q_{1,00}. \quad (73)$$

- 
- [1] Zhou, C. *et al.* Phase-encoded measurement-device-independent quantum key distribution with practical spontaneous-parametric-down-conversion sources. *Phys. Rev. A* **88**, 052333 (2013).
